# Supplementary material for: The induction of the p53 tumor suppressor protein bridges the apoptotic and autophagic signaling pathways to regulate cell death in prostate cancer cells
Source: PubMed Central journal article supplement (PMC4279402; doi:10.18632/oncotarget.2528), 2014-09-26

## The induction of the p53 tumor suppressor protein bridges the apoptotic and autophagic signaling pathways to regulate cell death in prostate cancer cells

### Supplementary Material

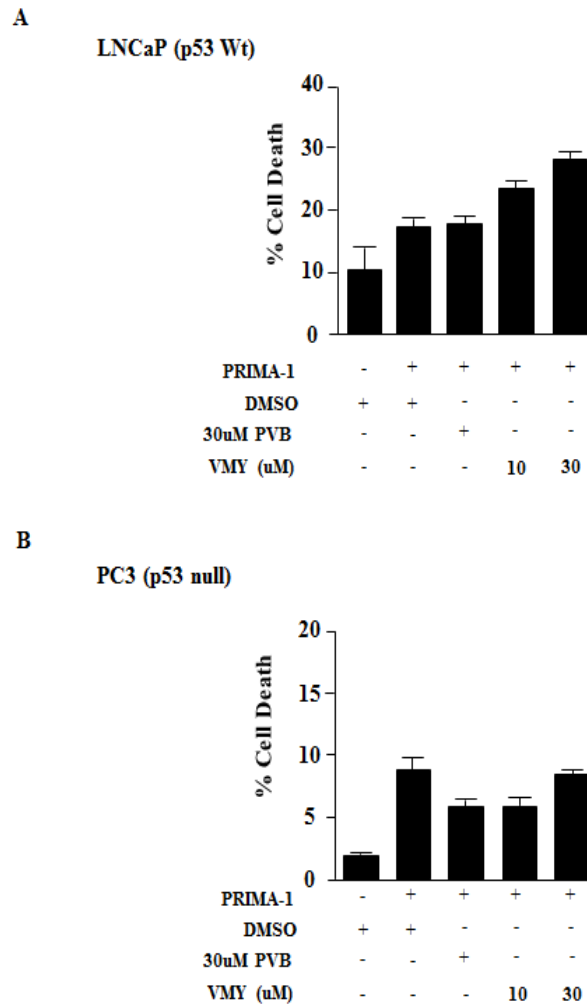

**Fig S1:** PRIMA-1 does not influence VMY sensitivity in **A)** p53 WT and **B)** p53 null prostate cancer cells. Both cell types were treated with 75 uM PRIMA-1 and either VMY at 10uM or 30uM or 30 uM PVB (purvalanol B) at 30uM for 18 hrs. Cell viability was measured by trypan blue dye exclusion.

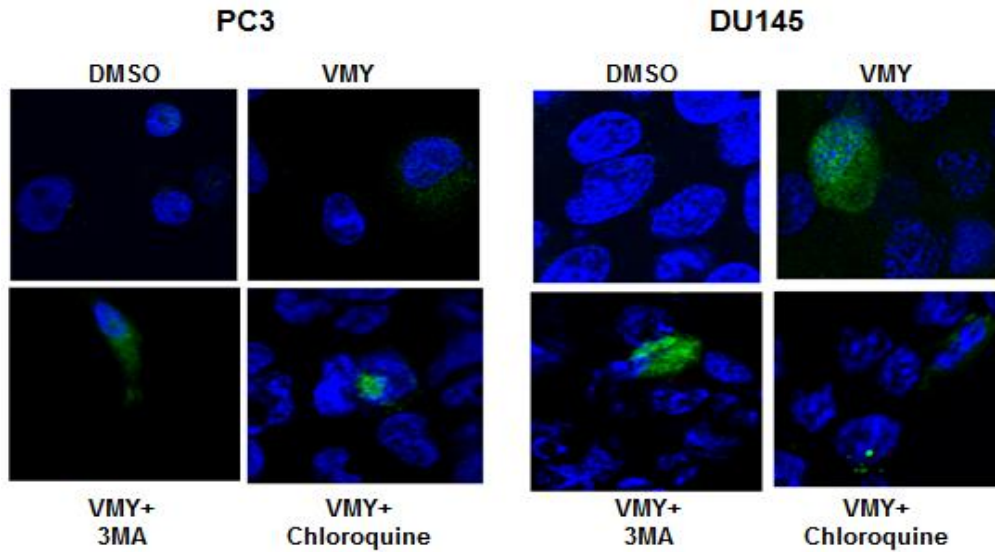

**Fig S2:** VMY fails to induce autophagy in PC3 (Left) and DU145 cells (Right) as measured by LC3-GFP fluorescence. 3MA, 3-methyladenine

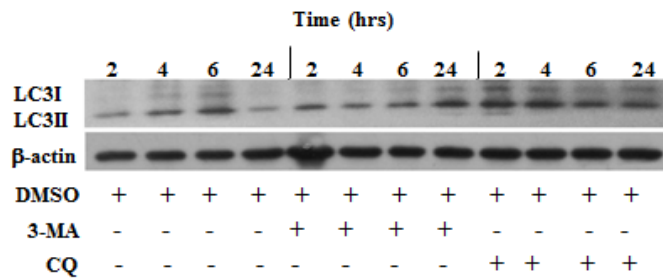

**Fig S3:** Basal levels of autophagic proteins in DMSO control cells. The effects of 5  $\mu$ M 3-methyladenine(3-MA) or 50  $\mu$ M chloroquine (CQ) on the autophagic markers p62 and LC3I/II, were assessed in LNCaP cells. Samples were collected at the times shown. The membranes were probed for p62 and LC3I/II, with  $\beta$ -actin as a loading control.

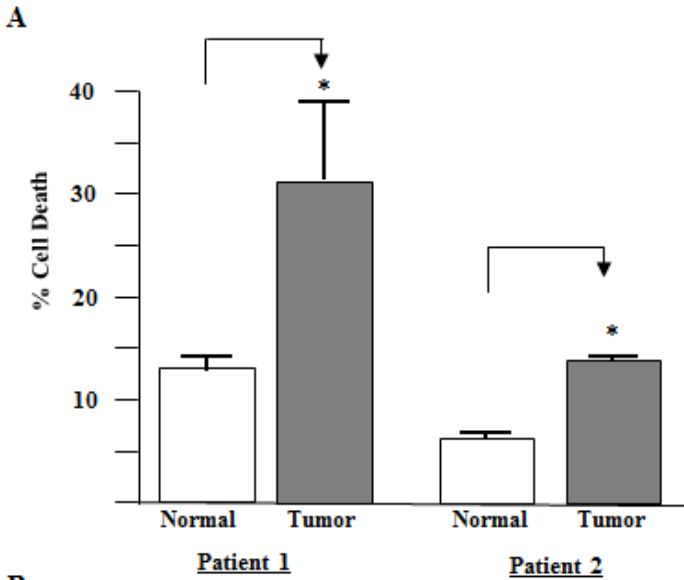

**B**  
Patient 1: Tumor Derived CRCs

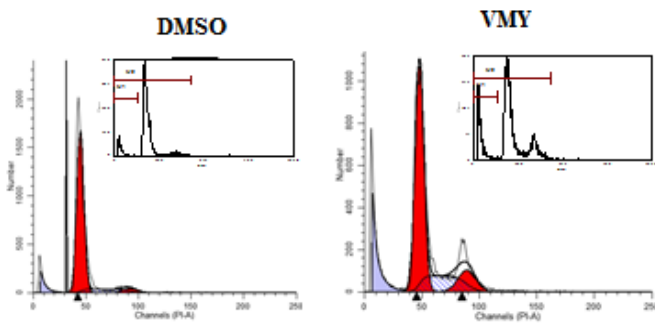

|           | Treatment |            |
|-----------|-----------|------------|
| (%)       | DMSO      | VMY (30uM) |
| G1        | 86        | 67         |
| S         | 10        | 20         |
| G2/M      | 4         | 13         |
| subG1     | 9         | 20         |
| annexin V | 1.6       | 5.7        |

Patient 2: Tumor Derived CRCs

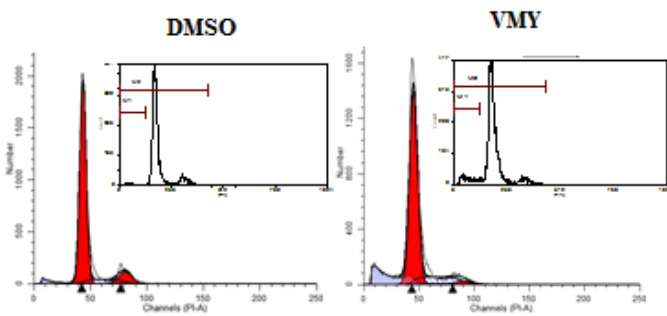

|           | Treatment |            |
|-----------|-----------|------------|
| (%)       | DMSO      | VMY (30uM) |
| G1        | 82        | 82         |
| S         | 8         | 15         |
| G2/M      | 10        | 3          |
| subG1     | 3         | 10         |
| annexin V | 2.0       | 4.4        |

**Fig S4:** Effects of VMY on CRCs from Patients 1 and 2. **A)** Cell viability as measured by trypan blue of patient-matched CRCs following 18hr exposure to 30uM VMY. **B)** Cell cycle effect of 18hr exposure to 30uM VMY as measured by flow cytometry. \*  $p < 0.05$ .

## CRCs from Patient 2

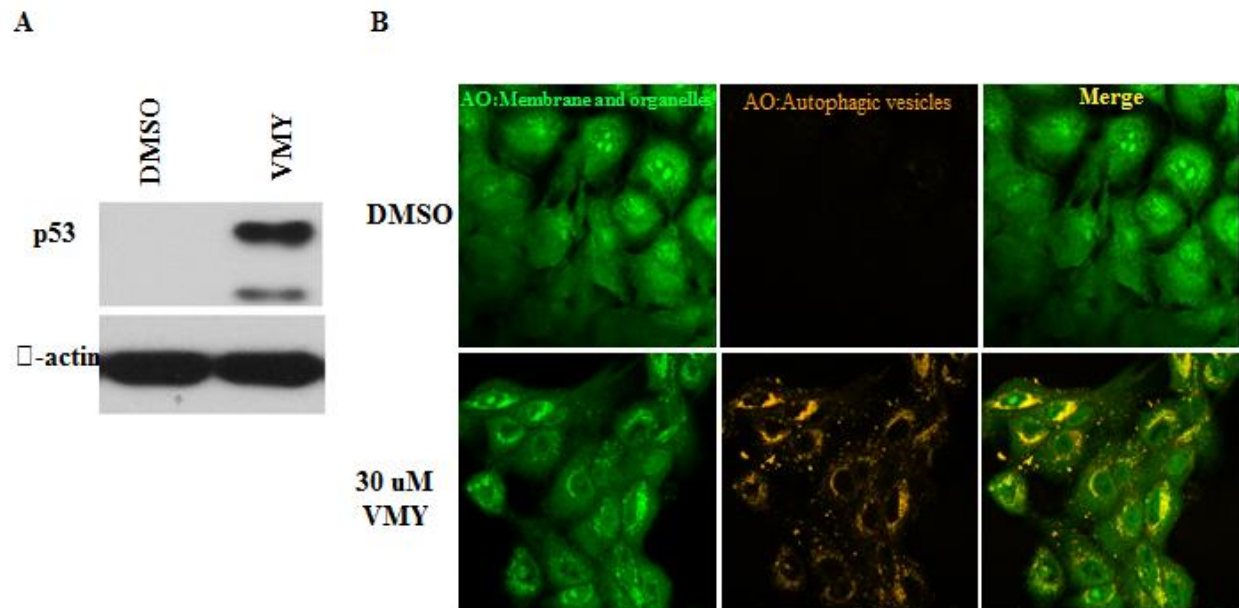

Supplement: oncotarget-05-10678-s001.pdf [file oncotarget-05-10678-s001.pdf]
